# Supplementary material
Source: PubMed Central journal article supplement (PMC1851831)
Supplement: plntphys_pp.106.094110_3.pdf [file plntphys_pp.106.094110_3.pdf]

## **SUPPLEMENTARY DATA**

### **Supplementary Figure 1**

#### **YFP-Sec24 labels ERES and additional punctate structures**

Co-expression of ERD2-GFP (**A**) with YFP-Sec24 (**B**) shows that the ERES marker is distributed in the cytosol and at punctate structures. The majority of these are found in the peri-Golgi area (arrows, **C**) with the exception of occasional punctate structures that are not in the proximity of a Golgi body (arrowhead, **C**)

Bar = 5  $\mu$ m

### **Supplementary Figure 2**

#### **Overexpression of Sec12-YFP inhibits transport of TmCCASP to the Golgi apparatus**

**A)** TmCCASP labels the Golgi apparatus and ER when expressed alone

**B-D)** On expression of Sec12-YFP (**C**), TmCCASP was partially redistributed to the ER (**B,D**)

Bars = 5  $\mu$ m
