# Supplementary material
Source: PubMed Central journal article supplement (PMC1851831)

Supplementary Figure 1

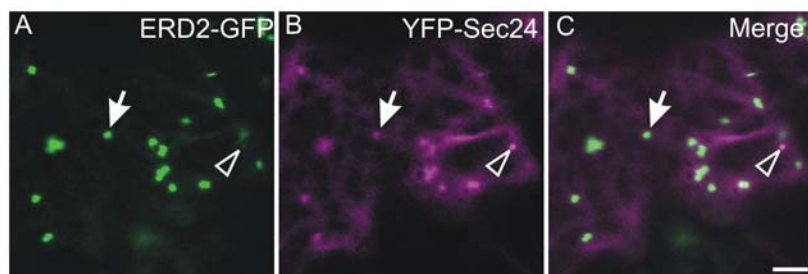

Supplement: plntphys_pp.106.094110_1.pdf [file plntphys_pp.106.094110_1.pdf]

Supplementary Figure 2

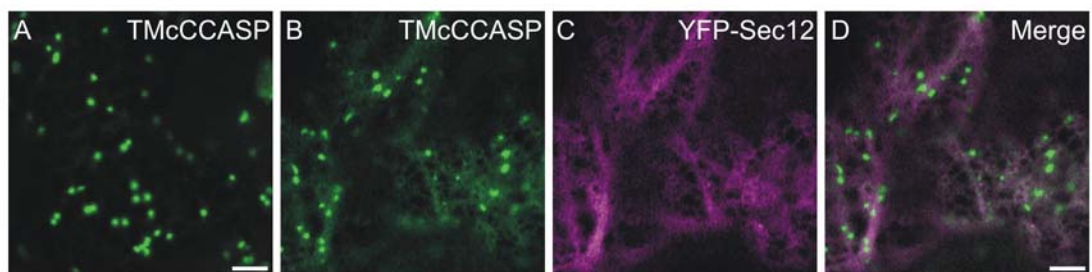

Supplement: plntphys_pp.106.094110_2.pdf [file plntphys_pp.106.094110_2.pdf]
